# Supplementary material for: The Progress of the New South Wales Aboriginal Oral Health Plan 2014–2020: A Scoping Review
Source: MDPI journal article supplement (doi:10.3390/healthcare10040650), 2022-03-30
Supplement: s1 [file s1]

## Medline search strategy

| Ovid MEDLINE(R) ALL <1946 to February 14, 2020> |                                                                                         |         |            |
|-------------------------------------------------|-----------------------------------------------------------------------------------------|---------|------------|
| #                                               | Search Statement                                                                        | Results | Annotation |
| 1                                               | Oceanic Ancestry Group/                                                                 | 9986    |            |
| 2                                               | aborigin*.mp.                                                                           | 9763    |            |
| 3                                               | indigenous.mp.                                                                          | 32827   |            |
| 4                                               | torres strait*.mp.                                                                      | 1712    |            |
| 5                                               | first nation*.mp.                                                                       | 4507    |            |
| 6                                               | ATSI.mp.                                                                                | 59      |            |
| 7                                               | 1 or 2 or 3 or 4 or 5 or 6                                                              | 47391   |            |
| 8                                               | New South Wales/                                                                        | 12616   |            |
| 9                                               | new south wales.mp.                                                                     | 16445   |            |
| 10                                              | 8 or 9                                                                                  | 16445   |            |
| 11                                              | Oral Health/                                                                            | 16067   |            |
| 12                                              | (oral health adj2 (plan* or promotion* or program* or intervention* or service*)).mp.   | 2948    |            |
| 13                                              | (dental health adj2 (plan* or promotion* or program* or intervention* or service*)).mp. | 5071    |            |
| 14                                              | Dental Health Services/                                                                 | 4062    |            |
| 15                                              | 11 or 12 or 13 or 14                                                                    | 21579   |            |
| 16                                              | 7 and 10 and 15                                                                         | 24      |            |
| 17                                              | limit 16 to last 5 years                                                                | 13      |            |

Execute Searches in Ovid
